# Supplementary material for: Controllable synthesis of ferromagnetic–antiferromagnetic core–shell NWs with tunable magnetic properties
Source: Royal Society of Chemistry journal article supplement (doi:10.1039/c7nr01471f), 2017-01-01
Supplement: c7nr01471f1.pdf [file c7nr01471f1.pdf]

## Supplementary Information

### Controllable synthesis of ferromagnetic-antiferromagnetic core-shell NWs with tunable magnetic properties

M. Irfan, C. J. Wang, U. Khan, W. J. Li, X. M. Zhang, W. J. Kong, P. Liu, C. H. Wan, Y. W. Liu, X. F. Han\*

Beijing national laboratory for condensed matter physics, institute of physics, University of Chinese academy of sciences, Chinese academy of sciences, Beijing, 100190, China.

\*Corresponding Author ([xfhan@iphy.ac.cn](mailto:xfhan@iphy.ac.cn))

#### Structural analysis:-

In case of Ni-nanocore Bragg's peaks reflected from (111), (200) and (220) planes are located at  $2\theta = 44.40^\circ$ ,  $51.69^\circ$  and  $76.15^\circ$ , respectively and correspond to cubic crystal structure, designating with the filled circles in Fig. S2. Moreover, Bragg's peaks reflected from (110), (200) and (211) planes are located at  $2\theta = 44.60^\circ$ ,  $65.03^\circ$  and  $82.26^\circ$ , respectively and correspond to cubic crystal structure for the case of Fe nanocore and designated with the filled tilted squares at an angle of  $45^\circ$ . The structural behavior of NWs embedded in NSs is similar with JCPDS (PDF#65-0380 and PDF#65-4899) respectively.

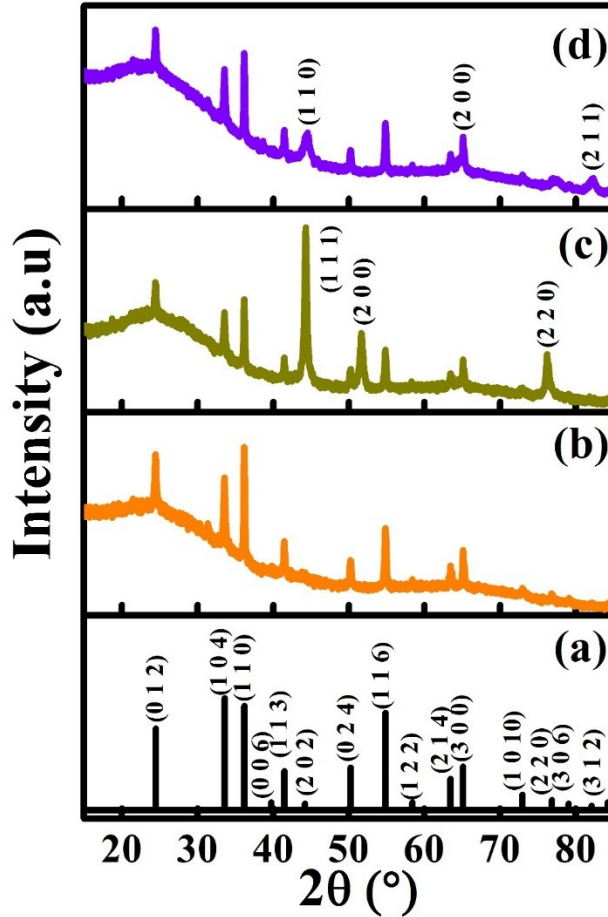

Fig. S1 XRD-patterns of core-shell NWs geometry, (a) Indexing of reflections using (PDF#38-1479) diffraction card, (b) Structural analysis of  $\text{Cr}_2\text{O}_3$  NSs within the template, (c) XRD pattern for Ni/ $\text{Cr}_2\text{O}_3$  core-shell NWs and (d) XRD pattern for Fe/ $\text{Cr}_2\text{O}_3$  core-shell NWs.

### Role of Etching solution in present study:-

Usually NaOH etching solution is being use widely to remove the AAO-template partially or complete, however when we tried to use NaOH solution for  $\text{Cr}_2\text{O}_3$  NSs, we observed that this solution also etched our  $\text{Cr}_2\text{O}_3$  NTs. So, we need to change the etching agent which remove AAO-template but not the  $\text{Cr}_2\text{O}_3$  NSs geometry. Fig. S1 displays the morphology for the case of NaOH

Solution. Then we used new etching solution containing 4.5g  $\text{CrO}_3$  and 3.1 ml  $\text{H}_3\text{PO}_4$  in 100ml of deionized water and achieved crack-free, highly uniform and good morphology for  $\text{Cr}_2\text{O}_3$  NSs as shown and discussed in details in the main manuscript.

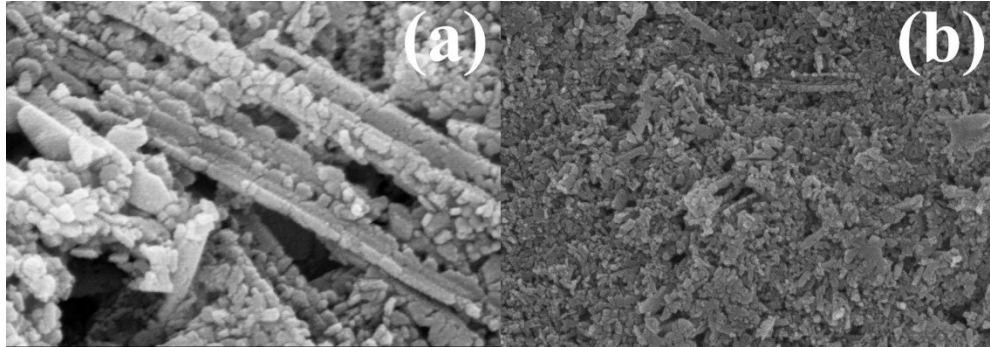

Fig. S2 SEM images  $\text{Cr}_2\text{O}_3$  NSs etched using NaOH
